# Supplementary material for: Structural diversity of three new Co(ii)-based MOFs as a UV light-driven photocatalyst: photocatalytic performance
Source: Royal Society of Chemistry journal article supplement (doi:10.1039/d3nj03452f), 2023-01-01
Supplement: d3nj03452f1.pdf [file d3nj03452f1.pdf]

## Supporting information

### Experimental section

All reagents and solvents used were analytical grade. A Bruker D8 diffractometer with monochromatic radiation, a scanning rate of  $6^\circ/\text{min}$ , and a step size of  $0.02^\circ$  was used to capture the powder X-ray diffraction (PXRD) spectra. Direct methods were used to solve the structures, then full-matrix least-squares on  $F^2$  were used to refine them. The SHELXTL program was used for structure solving, refinement, and data output. Anisotropic refinement was used on non-hydrogen atoms. DIAMOND-4.6 and MERCURY were used to form pictures and hydrogen bonding associations. Nicolet Impact 750 FTIR was used to record the Fourier transform infrared (FT-IR) spectrum in KBr disc between  $400\text{-}4000\text{ cm}^{-1}$ . TGA was carried out in nitrogen environment from ambient temperature to  $900\text{ }^\circ\text{C}$  at a heating rate of  $10\text{ }^\circ\text{C min}^{-1}$ .

### X-ray crystallographic data collection and structural determination

The crystallographic diffraction data for **1–3** were collected on a Bruker SMART APEX II CCD diffractometer with graphite-monochromated Mo K $\alpha$  radiation ( $k = 0.71073\text{ \AA}$ ) at  $296(2)\text{ K}$  using the  $\omega/\chi$  scanning technique. All the structures were solved using direct methods and successive Fourier difference synthesis, and refined using the full-matrix least-squares method on  $F^2$  with anisotropic thermal parameters for all non-hydrogen atoms by SHELXS-97. An empirical absorption correction was applied using the SADABS program. Basic information pertaining to crystal parameters and structure refinements are summarized in Table S1. Selected bond lengths and angles for **1–3** are listed in Table S2. Hydrogen bonding distance and angle data are listed in Table S3, shown in Supplementary data. CCDC: 2244699-2244701.

**Table 1. Crystallographic data and structure refinement details for 1-3**

| Parameter | <b>1</b> | <b>2</b> | <b>3</b> |
|-----------|----------|----------|----------|
|-----------|----------|----------|----------|

|                                                                                       |                |                |                |
|---------------------------------------------------------------------------------------|----------------|----------------|----------------|
| Formula weight                                                                        | 882.72         | 1188.91        | 929.64         |
| Crystal system                                                                        | Triclinic      | Orthorhombic   | Triclinic      |
| Space group                                                                           | <i>P-1</i>     | <i>P21212</i>  | <i>P-1</i>     |
| Crystal Color                                                                         | Pink           | Pink           | Pink           |
| <i>a</i> , Å                                                                          | 9.9846(14)     | 18.3153(4)     | 11.1329(3)     |
| <i>b</i> , Å                                                                          | 13.9514(18)    | 19.6079(6)     | 11.1958(3)     |
| <i>c</i> , Å                                                                          | 15.528(2)      | 8.6585(2)      | 17.3063(4)     |
| $\alpha$ , °                                                                          | 73.277(2)      | 90             | 84.085(2)      |
| $\beta$ , °                                                                           | 85.155(2)      | 90             | 78.096(2)      |
| $\gamma$ , °                                                                          | 75.511(3)      | 90             | 67.442(3)      |
| <i>V</i> , Å <sup>3</sup>                                                             | 2005.5(5)      | 3109.48(14)    | 1948.53(10)    |
| <i>Z</i>                                                                              | 2              | 2              | 2              |
| $\rho_{\text{calcd}}$ , g/cm <sup>3</sup>                                             | 1.462          | 1.270          | 1.584          |
| $\mu$ , mm <sup>-1</sup>                                                              | 0.499          | 4.712          | 7.286          |
| <i>F</i> (000)                                                                        | 914            | 1224           | 956            |
| $\theta$ Range, deg                                                                   | 1.4-27.6       | 3.3-76.3       | 4.3-76.1       |
| Reflection Collected                                                                  | 8703           | 6067           | 7616           |
| Independent reflections ( <i>R</i> <sub>int</sub> )                                   | 0.052          | 0.051          | 0.054          |
| Reflections with <i>I</i> > 2 $\sigma$ ( <i>I</i> )                                   | 4371           | 5217           | 6840           |
| Number of parameters                                                                  | 527            | 351            | 561            |
| <i>R</i> <sub>1</sub> , <i>wR</i> <sub>2</sub> ( <i>I</i> > 2 $\sigma$ ( <i>I</i> ))* | 0.1067, 0.2809 | 0.0779, 0.1876 | 0.0494, 0.1211 |
| <i>R</i> <sub>1</sub> , <i>wR</i> <sub>2</sub> (all data)**                           | 0.2014, 0.3219 | 0.0878, 0.1946 | 0.0555, 0.1244 |

\*  $R = \sum(F_o - F_c) / \sum(F_o)$ , \*\*  $wR_2 = \{\sum[w(F_o^2 - F_c^2)^2] / \sum(F_o^2)^2\}^{1/2}$ .

**Table 2.** Selected bond distances (Å) and angles (deg) for **1-3**

|              |          |              |          |
|--------------|----------|--------------|----------|
| <b>1</b>     |          |              |          |
| Co(1)-O(1)   | 2.025(7) | Co(1)-N(1)   | 2.118(8) |
| Co(1)-N(4)#1 | 2.117(8) | Co(1)-O(3)#2 | 2.123(6) |
| Co(1)-O(2)#3 | 2.042(7) |              |          |
| <b>2</b>     |          |              |          |
| Co(1)-O(1)   | 2.020(5) | Co(1)-O(6)   | 2.110(6) |

|               |          |               |            |
|---------------|----------|---------------|------------|
| Co(1)-N(1)    | 2.069(7) | Co(1)-O(4)#1  | 2.045(6)   |
| Co(1)-N(4)#2  | 2.020(4) |               |            |
| <b>3</b>      |          |               |            |
| Co(1)-O(2)    | 2.134(2) | Co(1)-O(11)   | 2.0249(19) |
| Co(1)-N(1)    | 2.144(2) | Co(1)-O(10)#1 | 2.080(2)   |
| Co(1)-O(4)#2  | 2.159(2) | Co(1)-O(8)#2  | 2.086(2)   |
| Co(2)-O(1)    | 2.073(2) | Co(2)-O(11)   | 2.067(2)   |
| Co(2)-O(9)#1  | 2.232(2) | Co(2)-N(4)#3  | 2.168(3)   |
| Co(2)-O(30#4) | 2.181(2) | Co(2)-O(11)#5 | 2.0688(19) |

|                      |           |                      |            |
|----------------------|-----------|----------------------|------------|
| <b>1</b>             |           |                      |            |
| O(1)-Co(1)-N(1)      | 86.2(3)   | O(1)-Co(1)-N(4)#1    | 90.0(3)    |
| O(1)-Co(1)-O(3)#2    | 100.8(3)  | O(1)-Co(1)-C(8)#2    | 129.9(3)   |
| O(1)-Co(1)-O(2)#3    | 112.7(3)  | N(1)-Co(1)-N(4)#1    | 176.2(4)   |
| O(3)#2-Co(1)-N(1)    | 93.3(3)   | N(1)-Co(1)-C(8)#2    | 93.0(3)    |
| O(2)#3-Co(1)-N(1)    | 88.2(3)   | O(3)#2-Co(1)-N(4)#1  | 86.7(3)    |
| N(4)#1-Co(1)-C(8)#2  | 88.9(3)   | O(2)#3-Co(1)-N(4)#1  | 93.9(3)    |
| O(3)#2-Co(1)-C(8)#2  | 29.2(3)   | O(2)#3-Co(1)-O(3)#2  | 146.5(3)   |
| O(2)#3-Co(1)-C(8)#2  | 117.4(3)  |                      |            |
| <b>2</b>             |           |                      |            |
| O(1)-Co(1)-O(6)      | 90.3(2)   | O(1)-Co(1)-N(1)      | 91.3(2)    |
| O(1)-Co(1)-O(4)#1    | 142.2(2)  | O(1)-Co(1)-N(4)#2    | 104.3(3)   |
| O(6)-Co(1)-N(1)      | 174.4(3)  | O(4)#1-Co(1)-O(6)    | 87.5(2)    |
| O(6)-Co(1)-N(4)#2    | 89.7(3)   | O(4)#1-Co(1)-N(1)    | 88.0(3)    |
| N(1)-Co(1)-N(4)#2    | 95.1(3)   | O(4)#1-Co(1)-N(4)#2  | 113.4(3)   |
| <b>3</b>             |           |                      |            |
| O(2)-Co(1)-O(11)     | 95.56(8)  | O(2)-Co(1)-N(1)      | 86.63(8)   |
| O(2)-Co(1)-O(10)#1   | 94.59(9)  | O(2)-Co(1)-O(4)#2    | 171.02(8)  |
| O(2)-Co(1)-O(8)#2    | 92.14(9)  | O(11)-Co(1)-N(1)     | 172.19(11) |
| O(10)#1-Co(1)-O(11)  | 90.75(9)  | O(4)#2-Co(1)-O(11)   | 92.32(8)   |
| O(8)#2-Co(1)-O(11)   | 96.59(9)  | O(10)#1-Co(1)-N(1)   | 81.59(11)  |
| O(4)#2-Co(1)-N(1)    | 86.13(8)  | O(8)#2-Co(1)-N(1)    | 90.81(11)  |
| O(4)#2-Co(1)-O(10)#1 | 89.59(9)  | O(8)#2-Co(1)-O(10)#1 | 169.53(8)  |
| O(4)#2-Co(1)-O(8)#2  | 82.67(9)  | O(1)-Co(2)-O(11)     | 103.34(8)  |
| O(1)-Co(2)-O(9)#1    | 83.35(8)  | O(1)-Co(2)-N(4)#3    | 85.31(9)   |
| O(1)-Co(2)-O(3)#4    | 84.94(8)  | O(1)-Co(2)-O(11)#5   | 165.80(9)  |
| O(9)#1-Co(2)-O(11)   | 94.96(8)  | O(11)-Co(2)-N(4)#3   | 88.99(10)  |
| O(3)#4-Co(2)-O(11)   | 170.93(8) | O(11)-Co(2)-O(11)#5  | 83.09(8)   |
| O(9)#1-Co(2)-N(4)#3  | 168.58(8) | O(3)#4-Co(2)-O(9)#1  | 89.62(8)   |

|                      |           |                      |           |
|----------------------|-----------|----------------------|-----------|
| O(9)#1-Co(2)-O(11)#5 | 83.49(8)  | O(3)#4-Co(2)-N(4)#3  | 88.01(10) |
| O(11)#5-Co(2)-N(4)#3 | 107.66(9) | O(3)#4-Co(2)-O(11)#5 | 89.67(8)  |

Symmetry Codes: **For1:** #1=-1+x,y,1+z; #2=-x,-y,1-z; #3=1-x,-y,1-z; **For2:**  
#1=1/2+x,3/2-y,-z; #2=3/2-x,1/2+y,2-z; **For3:** #1=-1+x,1+y,z; #2=x,1+y,z; #3= 1+x,-  
1+y,-1+z; #4= 1-x,-y,-z; #5=1-x,1-y,-z.

**Table 3.** Hydrogen Bonds Distances (Å) and angles (deg) for **1-3**

| Contact D-H···A      | Distance, Å |        |           | Angle<br>D-H···A,<br>deg |
|----------------------|-------------|--------|-----------|--------------------------|
|                      | D-H         | H···A  | D···A     |                          |
| <b>1</b>             |             |        |           |                          |
| O(8)-H(8)···O(4)     | 0.8200      | 1.9100 | 2.669(12) | 153.00                   |
| O(10)-H(10)···O(11)  | 0.8200      | 1.7500 | 2.565(15) | 170.00                   |
| C(25)-H(25)···O(2)   | 0.9300      | 2.5200 | 2.979(11) | 110.00                   |
| C(30)-H(30)···O(6)   | 0.9300      | 2.5400 | 3.135(11) | 122.00                   |
| C(44)-H(44C)···O(11) | 0.9600      | 2.3700 | 2.761(17) | 104.00                   |
| <b>2</b>             |             |        |           |                          |
| O(6)-H(6B)···O(2)    | 0.9200      | 1.7900 | 2.589(8)  | 144.00                   |
| <b>3</b>             |             |        |           |                          |
| N(5)-H(5A)···O(9)    | 0.9000      | 1.8500 | 2.702(5)  | 157.00                   |
| N(5)-H(5B)···O(3)    | 0.9000      | 1.9700 | 2.704(5)  | 138.00                   |
| O(11)-H(11)···O(7)   | 0.9900      | 2.1000 | 2.954(4)  | 143.00                   |
| O(11)-H(11)···O(9)   | 0.9900      | 2.4800 | 2.866(3)  | 103.00                   |
| C(25)-H(25)···O(4)   | 0.9400      | 2.4000 | 2.930(4)  | 115.00                   |
| C(30)-H(30)···O(8)   | 0.9400      | 2.4100 | 3.344(4)  | 172.00                   |
| C(35)-H(35)···O(2)   | 0.9400      | 2.5400 | 3.274(4)  | 135.00                   |
| C(35)-H(35)···O(8)   | 0.9400      | 2.5400 | 3.310(4)  | 139.00                   |
| C(40)-H(40)···O(4)   | 0.9400      | 2.2200 | 3.039(4)  | 145.00                   |
| C(44)-H(44A)···O(7)  | 0.9700      | 2.5100 | 3.433(8)  | 160.00                   |
| C(44)-H(44B)···O(7)  | 0.9700      | 2.5200 | 3.347(8)  | 143.00                   |

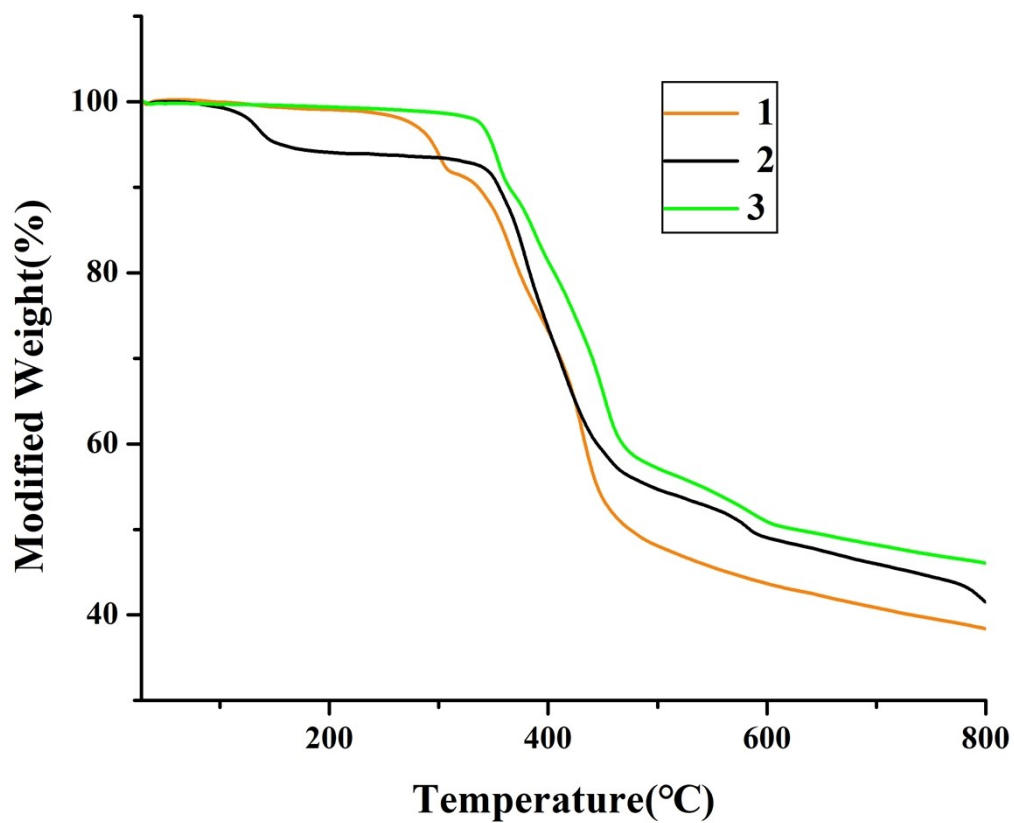

Figure S1. TGA of 1-3

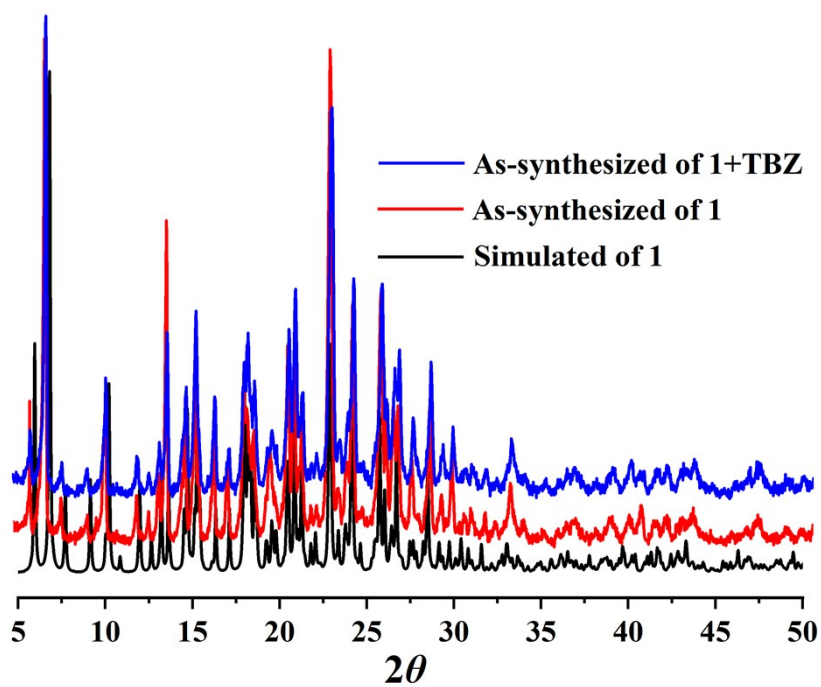

Figure S2. PXRD of 1.

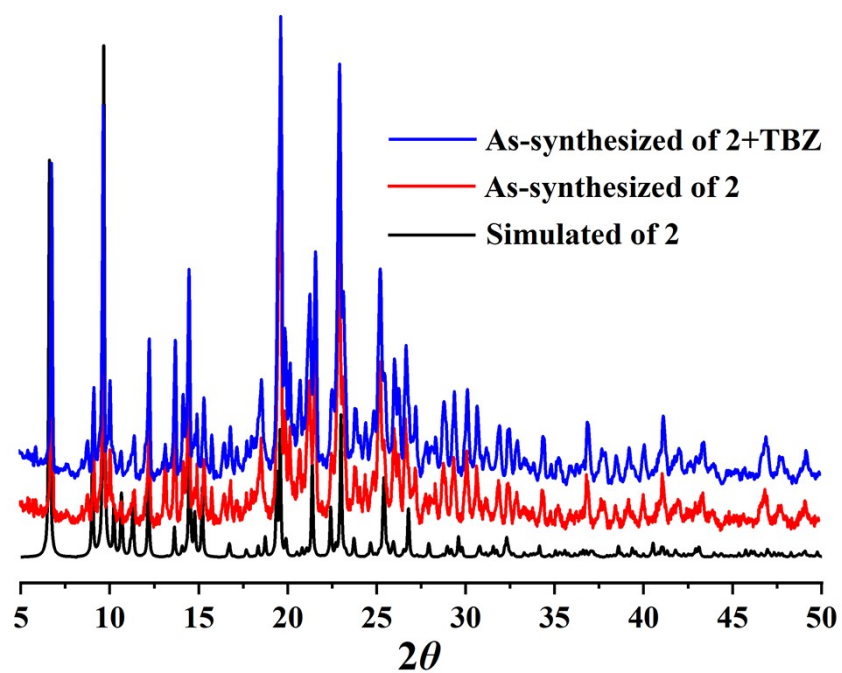

Figure S3. PXRD of 2.

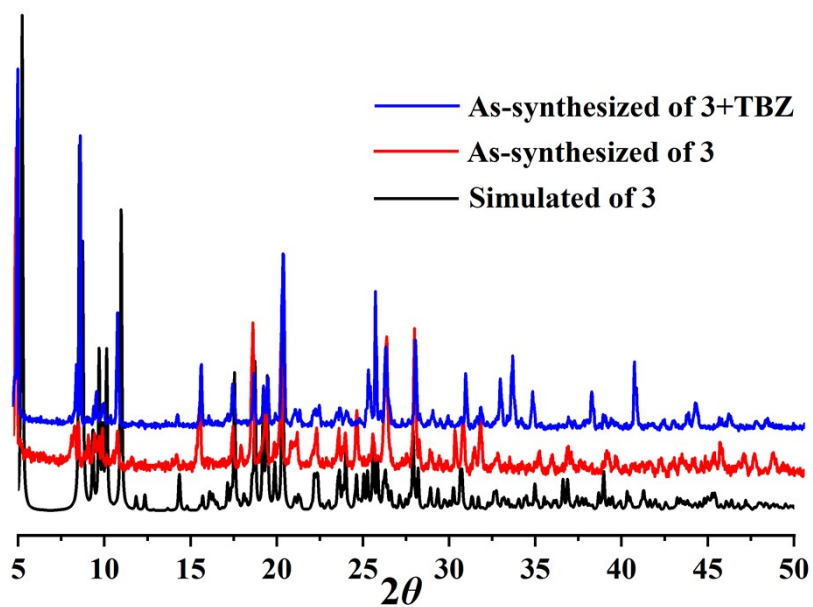

Figure S4. PXRD of 3.

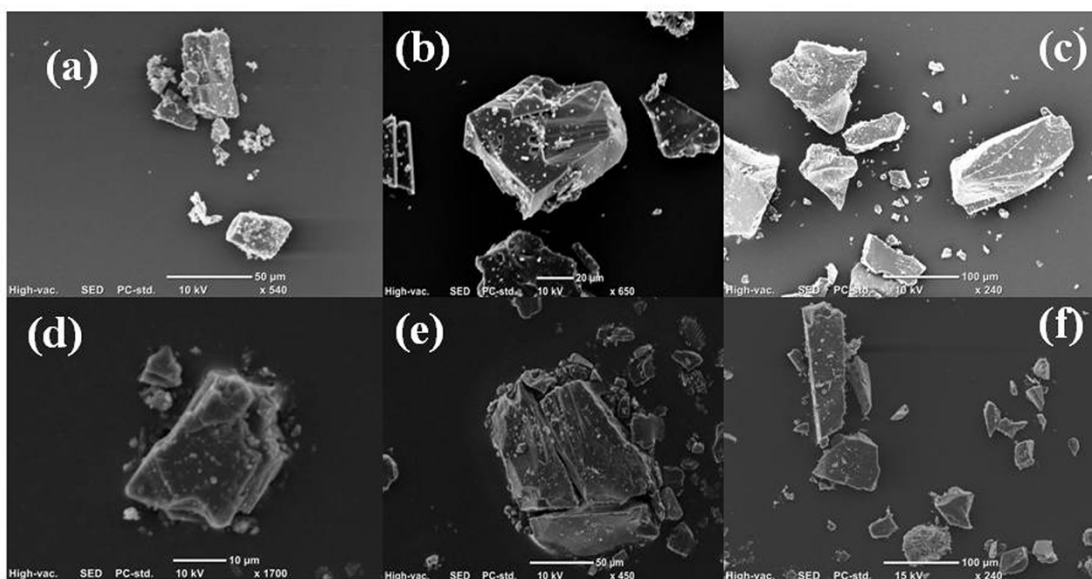

Fig. S5 SEM images of MOFs 1-3 before photocatalytic process (a)-(c); and after running photocatalysis (d)-(f).

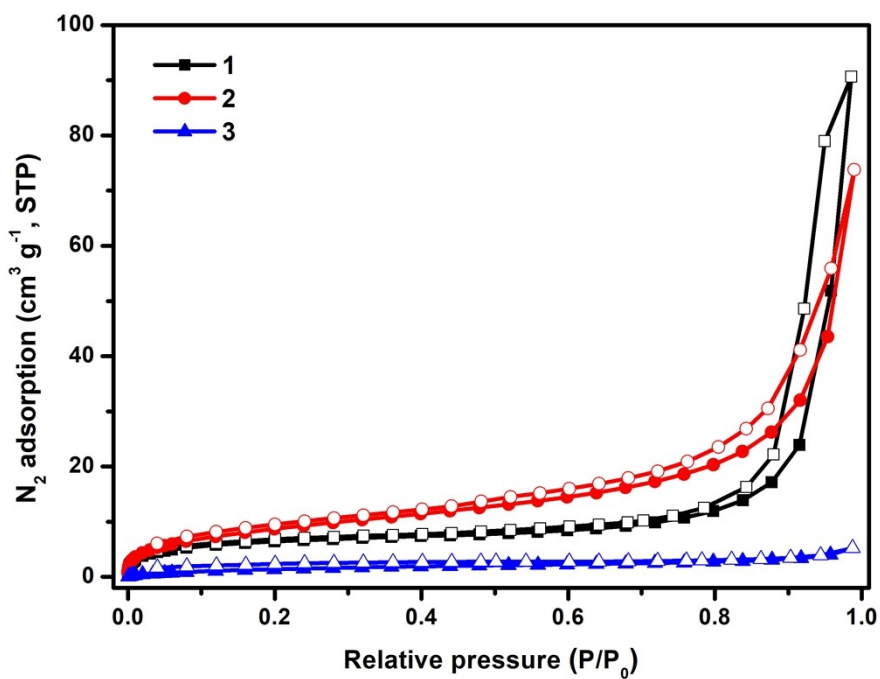

Fig. S6 N<sub>2</sub> adsorption–desorption isotherms of 1-3. The adsorption and desorption isotherms are displayed with circular and square-shaped symbols.



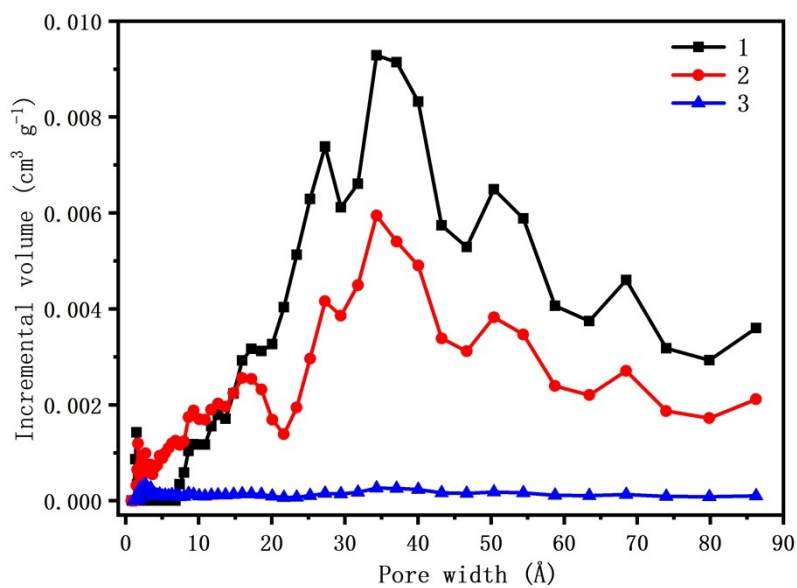

Fig. S7 pore size distribution of samples **1-3**.

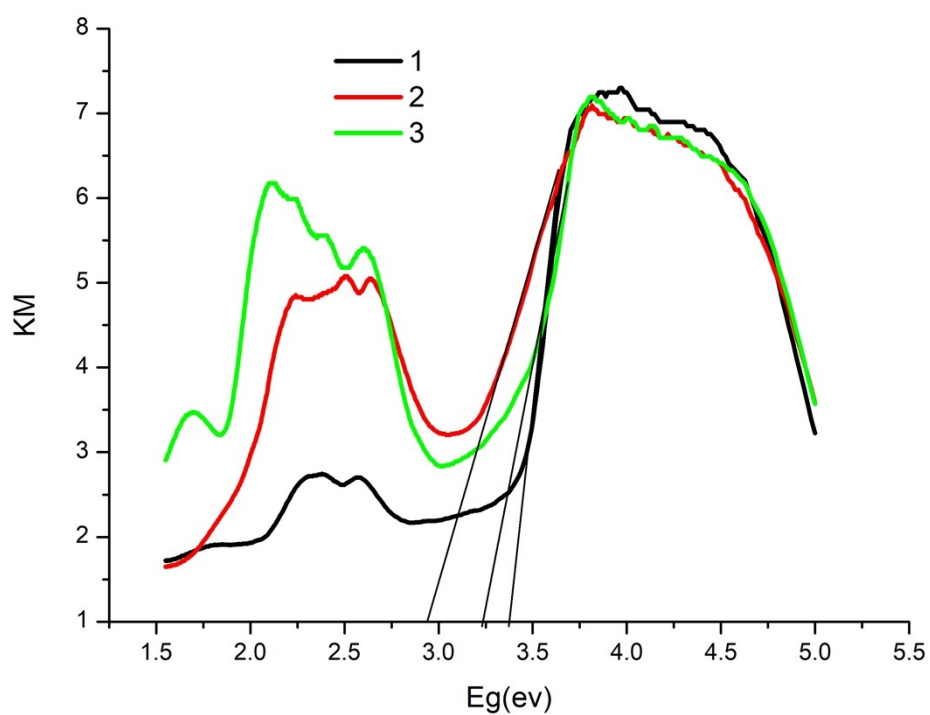

Figure S8. The diffuse reflectance (DR) UV-vis of **1-3**

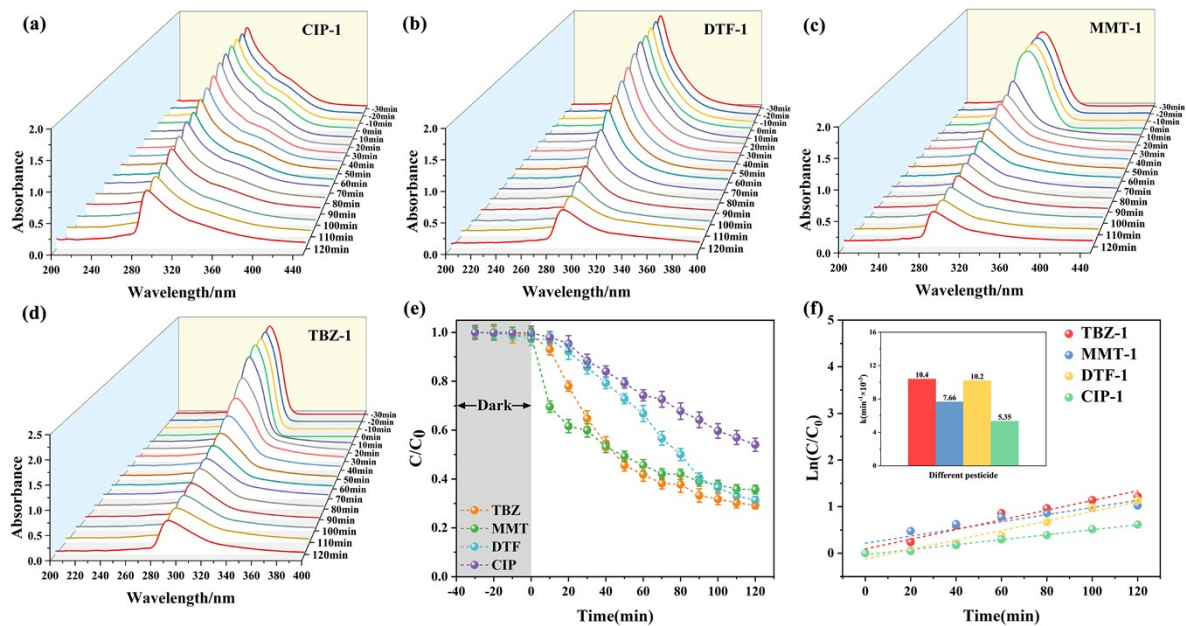

Figure S9. (a-d) time-dependent absorption of different Pesticide CIP, DTF, MMT, and TBZ using 1 (e,f) the concentration changes of the pesticide

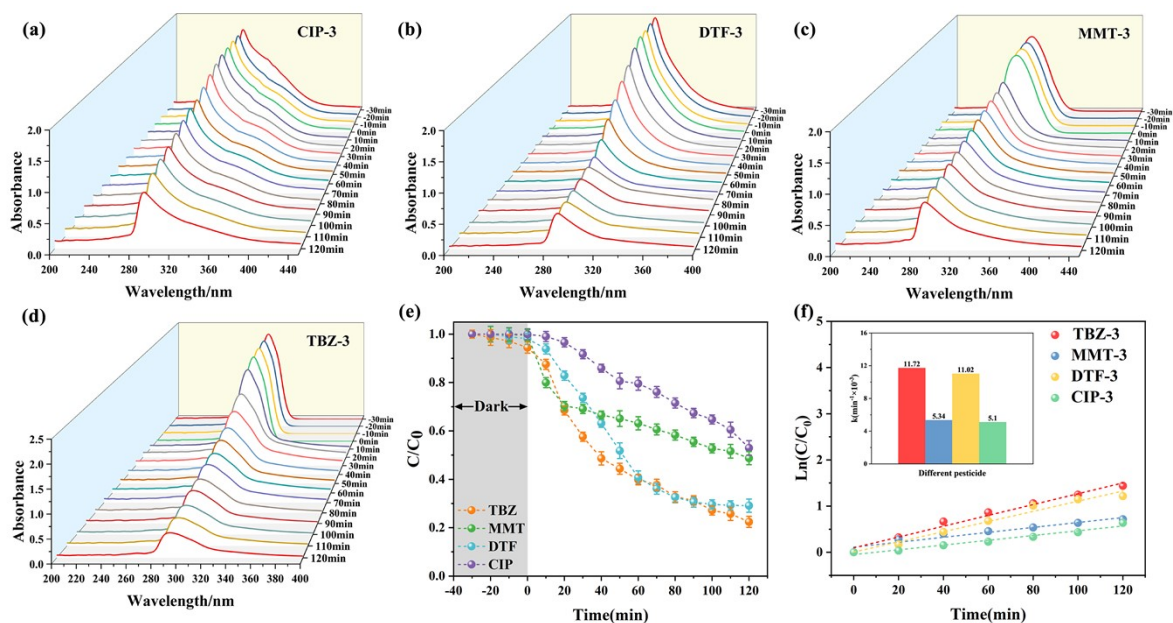

Figure S10. (a-d) time-dependent absorption of different Pesticide CIP, DTF, MMT, and TBZ using 3 (e,f) the concentration changes of the pesticide

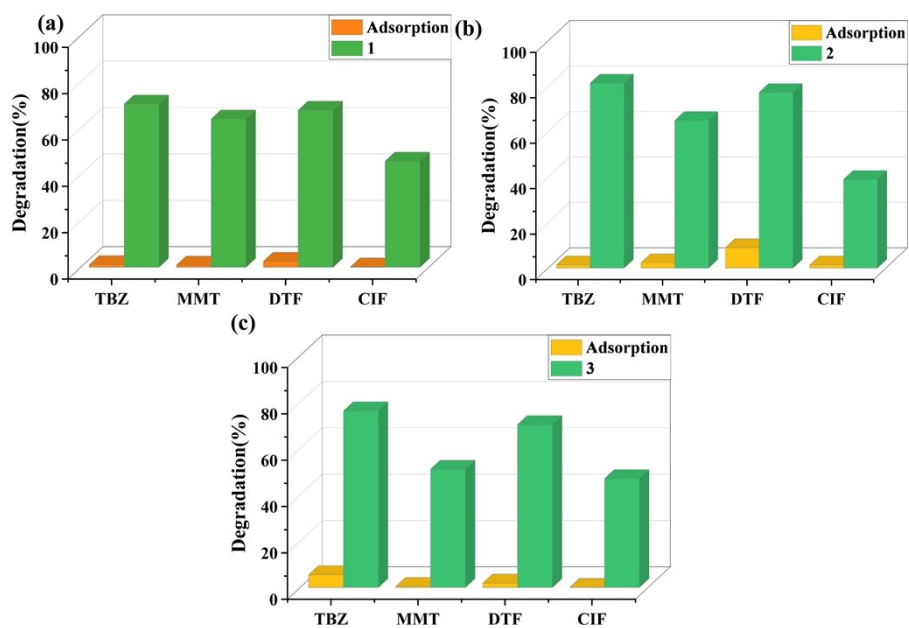

Figure S11. The degradation of 1, 2 and 3 at different pesticide

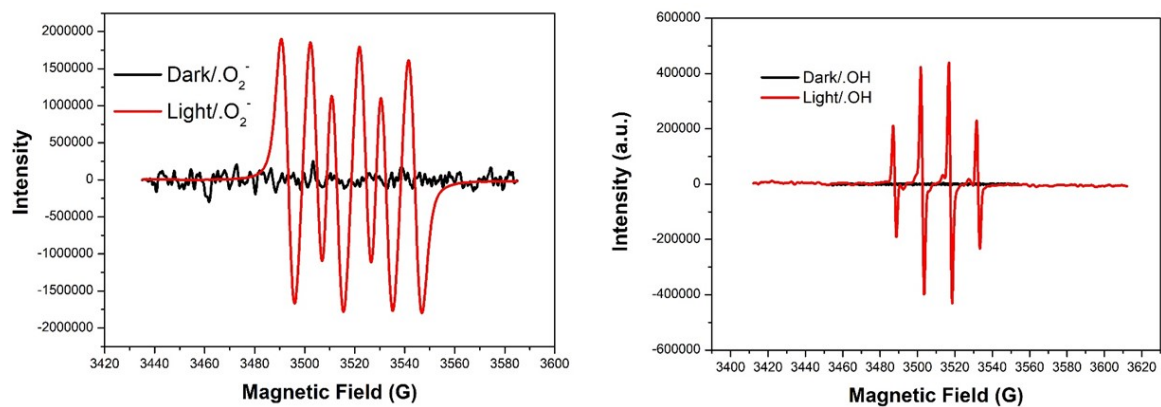

Figure S12. DMPO spin-trapping ESR spectra

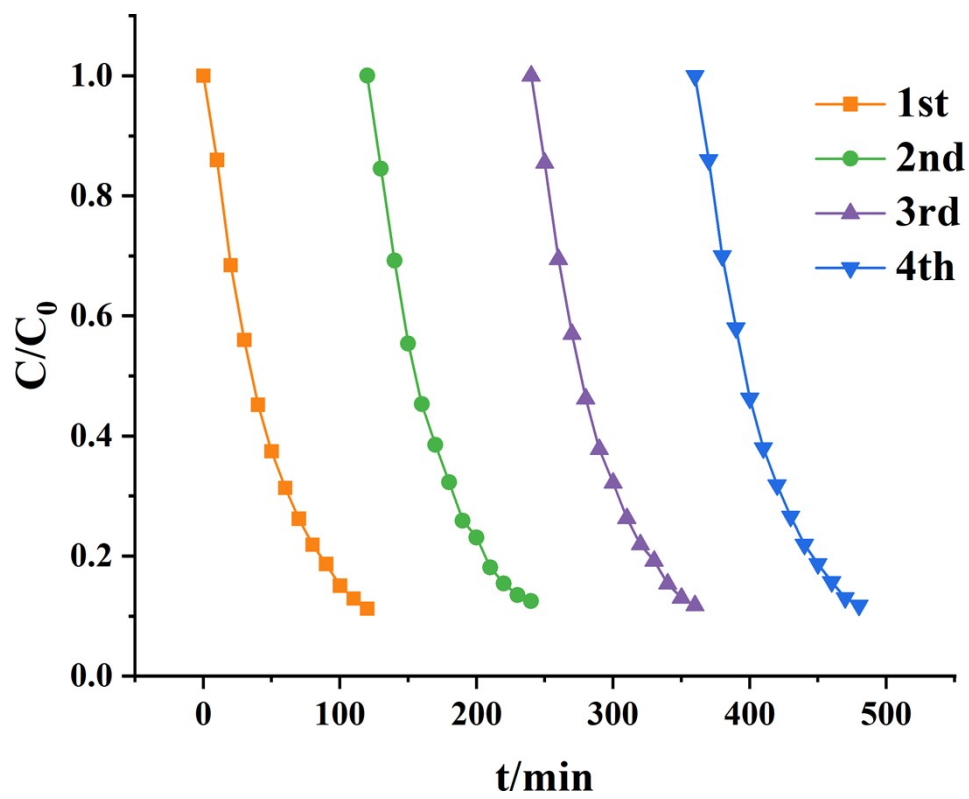

Figure S13. cycling runs of the photocatalytic degradation of TBZ for 2.
